# Supplementary material
Source: PubMed Central journal article supplement (PMC2268501)
Supplement: jvirol_JVI.02506-07_1.pdf [file jvirol_JVI.02506-07_1.pdf]

TABLE S1. Name, sampling year and gene accession number of the 253 isolates of *Rice yellow mottle virus* collected over a 40 year period in 16 countries<sup>1</sup> in Africa.

| Isolate <sup>1</sup> | Group <sup>2</sup> | Sampling year | Accession number               |                            | Sequence reference |
|----------------------|--------------------|---------------|--------------------------------|----------------------------|--------------------|
|                      |                    |               | Coat protein gene <sup>3</sup> | Full sequence <sup>3</sup> |                    |
| Be1                  | IV                 | 1999          | AJ885087                       |                            | (39)               |
| Be2                  | IV                 | 1999          | AJ885088                       |                            | (39)               |
| Be3                  | IV                 | 2003          | AM931172                       |                            | this study         |
| BF1                  | II                 | 1990          | AJ279901                       | AM883059                   | (33)               |
| BF2                  | III                | 1990          | AJ885089                       |                            | (39)               |
| BF5                  | III                | 2000          | AJ885090                       |                            | (39)               |
| BF570                | III                | 2000          | AJ885091                       |                            | (39)               |
| BF572                | III                | 2000          | AJ885092                       |                            | (39)               |
| BF682                | III                | 2000          | AJ885093                       |                            | (39)               |
| BF701                | -                  | 1997          | AM931173                       |                            | this study         |
| BF702                | III                | 1997          | AM931174                       |                            | this study         |
| Ca5                  | IV                 | 2000          | AJ317949                       |                            | (39)               |
| Ca30                 | IV                 | 2000          | AJ317950                       |                            | (39)               |
| Ca38                 | IV                 | 2000          | AJ306735                       |                            | (39)               |
| Ca54                 | IV                 | 2000          | AJ317951                       |                            | (39)               |
| CI1                  | III                | 1995          | AJ279902                       |                            | (33)               |
| CI2                  | III                | 1994          | AJ279903                       |                            | (33)               |
| CI3                  | III                | 1995          | AJ279904                       |                            | (33)               |
| CI4                  | III                | 1995          | AJ279905                       | AJ608206                   | (33)               |
| CI5                  | III                | 1995          | AJ279906                       |                            | (33)               |
| CI6                  | III                | 1996          | AJ279907                       |                            | (33)               |
| CI7                  | III                | 1995          | AJ279908                       |                            | (33)               |
| CI8                  | I                  | 1994          | AJ279909                       |                            | (33)               |
| CI9                  | I                  | 1994          | AJ279910                       |                            | (33)               |
| CI10                 | I                  | 1994          | AJ279911                       |                            | (33)               |
| CI11                 | I                  | 1994          | AJ279912                       |                            | (33)               |
| CI12                 | I                  | 1991          | AJ279913                       |                            | (33)               |
| CI13                 | I                  | 1991          | AJ279914                       |                            | (33)               |
| CI14                 | I                  | 1996          | AJ279915                       |                            | (33)               |
| CI15                 | I                  | 1997          | AJ279916                       |                            | (33)               |
| CI16                 | I                  | 1996          | AJ279917                       |                            | (33)               |
| CI17                 | I                  | 1975          | AJ279918                       |                            | (33)               |
| CI46                 | I                  | 1995          | AJ885094                       |                            | (39)               |
| CI47                 | I                  | 1997          | AJ885095                       |                            | (39)               |
| CI63                 | I                  | 1997          | AJ608207                       | AJ608207                   | (17)               |
| CI65                 | I                  | 1999          | AJ885096                       |                            | (39)               |
| CI66                 | III                | 1995          | AJ885097                       |                            | (39)               |
| CI67                 | I                  | 1997          | AJ885098                       |                            | (39)               |
| CI68                 | I                  | 1975          | AM931175                       |                            | this study         |
| CI101                | I                  | 2001          | AJ885099                       |                            | (39)               |
| CI104                | I                  | 2001          | AJ885100                       |                            | (39)               |
| CI105                | I                  | 2001          | AJ885101                       |                            | (39)               |
| CI106                | I                  | 2001          | AJ885102                       |                            | (39)               |
| CI109                | I                  | 2001          | AJ885103                       |                            | (39)               |
| CI110                | I                  | 2001          | AJ885104                       |                            | (39)               |
| CI111                | I                  | 2001          | AJ885105                       |                            | (39)               |
| CI112                | I                  | 2001          | AJ885106                       |                            | (39)               |
| CI113                | I                  | 2001          | AJ885107                       |                            | (39)               |
| CI114                | I                  | 2001          | AJ885108                       |                            | (39)               |
| CI115                | I                  | 2001          | AJ885109                       |                            | (39)               |

|       |     |      |          |          |                   |
|-------|-----|------|----------|----------|-------------------|
| CI116 | I   | 2001 | AJ885110 |          | (39)              |
| CI117 | III | 2001 | AJ885111 |          | (39)              |
| CI118 | III | 2001 | AJ885112 |          | (39)              |
| CI121 | I   | 2001 | AJ885113 |          | (39)              |
| CI129 | I   | 2001 | AJ885114 |          | (39)              |
| CI138 | I   | 2001 | AJ885115 |          | (39)              |
| CI139 | I   | 2002 | AJ885116 |          | (39)              |
| CI151 | I   | 2002 | AJ885117 |          | (39)              |
| CI152 | I   | 2002 | AJ885118 |          | (39)              |
| CI153 | I   | 2002 | AJ885119 |          | (39)              |
| CI154 | I   | 2002 | AJ885120 |          | (39)              |
| CI155 | I   | 2002 | AJ885121 |          | (39)              |
| CI156 | I   | 2002 | AJ885122 |          | (39)              |
| CI157 | I   | 2002 | AJ885123 |          | (39)              |
| CIa   | I   | 1975 | AJ608219 | AJ608219 | (17)              |
| CIb   | III | 1990 | L20893   | L20893   | direct submission |
| Gh1   | -   | 1995 | AJ279919 |          | (33)              |
| Gu1   | II  | 1991 | AJ279920 |          | (33)              |
| Gu21  | II  | 2002 | AJ885124 |          | (39)              |
| Gu26  | II  | 2002 | AJ885125 |          | (39)              |
| Gu28  | II  | 2002 | AJ885126 |          | (39)              |
| Gu29  | II  | 2002 | AJ885127 |          | (39)              |
| Gu30  | II  | 2006 | AM931176 |          | this study        |
| Gu31  | II  | 2006 | AM931177 |          | this study        |
| Ke1   | V   | 1966 | AJ511805 |          | (1)               |
| Ke2   | V   | 1966 | AJ885128 |          | (39)              |
| Ke3   | V   | 1966 | AM931178 |          | this study        |
| Ma1   | III | 1990 | AJ279926 |          | (33)              |
| Ma2   | III | 1990 | AJ279927 |          | (33)              |
| Ma3   | III | 1992 | AJ279928 |          | (33)              |
| Ma4   | II  | 1996 | AJ279929 |          | (33)              |
| Ma5   | II  | 1996 | AJ279930 |          | (33)              |
| Ma6   | II  | 1996 | AJ279931 |          | (33)              |
| Ma7   | II  | 1996 | AJ885129 |          | (39)              |
| Ma8   | -   | 1996 | AJ885130 |          | (39)              |
| Ma9   | -   | 1992 | AJ881531 |          | (39)              |
| Ma10  | -   | 1996 | AJ608208 | AJ608208 | (17)              |
| Ma29  | II  | 2000 | AJ885132 |          | (39)              |
| Ma41  | III | 2000 | AJ885133 |          | (39)              |
| Ma77  | -   | 2000 | AJ608209 | AJ608209 | (39)              |
| Ma98  | III | 2000 | AJ885134 |          | (39)              |
| Ma105 | II  | 2000 | AJ885135 |          | (39)              |
| Ma144 | -   | 2003 | AJ885136 |          | (39)              |
| Ma145 | -   | 2003 | AJ885137 |          | (39)              |
| Ma146 | -   | 2003 | AJ885138 |          | (39)              |
| Ma148 | II  | 2001 | AJ885139 |          | (39)              |
| Ma149 | II  | 2001 | AJ885140 |          | (39)              |
| Ma171 | -   | 2003 | AJ885141 |          | (39)              |
| Ma175 | -   | 2003 | AJ885142 |          | (39)              |
| Ma179 | II  | 2002 | AJ885143 |          | (39)              |
| Ma180 | II  | 2002 | AJ885144 |          | (39)              |
| Ma185 | II  | 2002 | AJ885145 |          | (39)              |
| Ma201 | -   | 1997 | AM931179 |          | this study        |
| Ma202 | -   | 1997 | AM931180 |          | this study        |
| Ma203 | II  | 1997 | AM931181 |          | this study        |
| Ma204 | -   | 1997 | AM931182 |          | this study        |
| Ma205 | -   | 1997 | AM931183 |          | this study        |
| Ma206 | -   | 1997 | AM931184 |          | this study        |
| Ma207 | III | 1997 | AM931185 |          | this study        |

|       |    |      |          |          |                   |
|-------|----|------|----------|----------|-------------------|
| Ma208 | II | 1997 | AM931186 |          | this study        |
| Ma209 | -  | 1997 | AM931187 |          | this study        |
| Ma210 | -  | 2003 | AJ885146 |          | (39)              |
| Mg1   | -  | 1989 | AJ279921 | AJ608210 | (33)              |
| Mg2   | -  | 1991 | AJ279922 | AJ608211 | (33)              |
| Mg3   | -  | 1991 | AJ279923 |          | (33)              |
| Mg4   | -  | 1991 | AJ279924 |          | (33)              |
| Mg5   | -  | 1991 | AJ279925 |          | (33)              |
| Mg6   | -  | 1991 | AM931189 |          | this study        |
| Mg10  | -  | 2003 | AM931190 |          | this study        |
| Mg11  | -  | 2003 | AM931191 |          | this study        |
| Mg12  | -  | 2003 | AM931192 |          | this study        |
| Mg13  | -  | 2003 | AM931193 |          | this study        |
| Mg14  | -  | 2003 | AM931194 |          | this study        |
| Mg15  | -  | 2003 | AM931195 |          | this study        |
| Mg16  | -  | 2003 |          | AM883056 | (34)              |
| Mg17  | -  | 2004 | AM931196 |          | this study        |
| Mg18  | -  | 2004 | AM931197 |          | this study        |
| Mg19  | -  | 2004 | AM931198 |          | this study        |
| Mg20  | -  | 2004 | AM931199 |          | this study        |
| Mg21  | -  | 2004 | AM931200 |          | this study        |
| Mg22  | -  | 2004 | AM931201 |          | this study        |
| Mg23  | -  | 2004 | AM931202 |          | this study        |
| Mg24  | -  | 2004 | AM931203 |          | this study        |
| Mg25  | -  | 2004 | AM931204 |          | this study        |
| Mg26  | -  | 2004 | AM931205 |          | this study        |
| Mg27  | -  | 2004 | AM931206 |          | this study        |
| Mg28  | -  | 2004 | AM931207 |          | this study        |
| Mg29  | -  | 2004 | AM931208 |          | this study        |
| Mg30  | -  | 2004 | AM931209 |          | this study        |
| Mg31  | -  | 2004 | AM931210 |          | this study        |
| Mg32  | -  | 2004 | AM931211 |          | this study        |
| Mg33  | -  | 2004 | AM931212 |          | this study        |
| Mg34  | -  | 2004 | AM931213 |          | this study        |
| Mg35  | -  | 2004 | AM931214 |          | this study        |
| Ng3   | IV | 1998 | AJ885147 |          | (39)              |
| Ng4   | IV | 1997 | AJ885148 |          | (39)              |
| Ng6   | IV | 1998 | AJ885149 |          | (39)              |
| Ng7   | IV | 2003 | AM931215 |          | this study        |
| Ng8   | IV | 2003 | AM931216 |          | this study        |
| Ng9   | IV | 2003 | AM931217 |          | this study        |
| Ng10  | IV | 2003 | AM931218 |          | this study        |
| Ng11  | IV | 2003 | AM931219 |          | this study        |
| Ni1   | IV | 1980 | AJ279932 | AJ608212 | (32)              |
| Ni2   | IV | 1980 | AJ279933 | AJ608213 | (32)              |
| Ni4   | IV | 1980 | AJ885150 |          | (39)              |
| Ni6   | IV | 1980 | AJ885151 |          | (39)              |
| Ni131 | IV | 1980 | AJ884691 |          | (39)              |
| Nia   | IV | 1980 | U23142   | U23142   | direct submission |
| SL1   | II | 1975 | AJ279935 |          | (32)              |
| SL2   | II | 1975 | AJ279936 |          | (32)              |
| SL3   | II | 1975 | AJ279937 |          | (32)              |
| SL4   | II | 1975 | AJ608214 | AJ608214 | (32)              |
| SL5   | II | 1975 | AJ885152 |          | (32)              |
| SL6   | II | 1975 | AJ279934 |          | (32)              |
| SL7   | II | 1975 | AJ885153 |          | (32)              |
| Tc11  | IV | 2000 | AJ317952 |          | (39)              |
| Tc17  | IV | 2000 | AJ317953 |          | (39)              |
| Tc24  | IV | 2000 | AJ317954 |          | (39)              |

|       |    |      |          |          |      |
|-------|----|------|----------|----------|------|
| Tg1   | IV | 2000 | AJ885166 |          | (39) |
| Tg4   | IV | 2000 | AJ885167 |          | (39) |
| Tg7   | IV | 2000 | AJ885168 |          | (39) |
| Tg9   | IV | 2000 | AJ885169 |          | (39) |
| Tg12  | IV | 2000 | AJ885170 |          | (39) |
| Tg17  | IV | 2000 | AJ885171 |          | (39) |
| Tg21  | IV | 1999 | AJ885172 |          | (39) |
| Tz1   | V  | 1997 | AJ279938 |          | (32) |
| Tz2   | -  | 1997 | AJ279939 |          | (32) |
| Tz3   | -  | 1997 | AJ279940 | AJ608216 | (32) |
| Tz4   | V  | 1997 | AJ511793 |          | (2)  |
| Tz5   | V  | 1997 | AJ511794 | AJ608217 | (2)  |
| Tz6   | V  | 1997 | AJ511795 |          | (2)  |
| Tz7   | V  | 1997 | AJ511796 |          | (2)  |
| Tz8   | -  | 1996 | AJ511797 | AJ608218 | (2)  |
| Tz9   | -  | 1997 | AJ511798 |          | (2)  |
| Tz10  | -  | 1997 | AJ511799 |          | (2)  |
| Tz11  | -  | 2001 | AJ511800 | AJ608215 | (2)  |
| Tz12  | -  | 1997 | AJ511801 |          | (2)  |
| Tz13  | V  | 1997 | AJ885154 |          | (39) |
| Tz14  | V  | 1997 | AJ885155 |          | (39) |
| Tz15  | V  | 1997 | AJ885156 |          | (39) |
| Tz16  | -  | 2002 | AJ885157 |          | (39) |
| Tz17  | -  | 2002 | AJ885158 |          | (39) |
| Tz18  | -  | 2002 | AJ885159 | AJ877020 | (39) |
| Tz19  | -  | 2002 | AJ885160 |          | (39) |
| Tz20  | -  | 2002 | AJ885161 |          | (39) |
| Tz21  | -  | 2002 | AJ885162 |          | (39) |
| Tz22  | -  | 2002 | AJ885163 |          | (39) |
| Tz23  | -  | 2002 | AJ885164 |          | (39) |
| Tz24  | -  | 2002 | AJ885165 |          | (39) |
| Tz101 | -  | 1999 | AJ884693 |          | (39) |
| Tz102 | -  | 1999 | AJ884705 |          | (39) |
| Tz104 | -  | 1999 | AJ884690 |          | (39) |
| Tz105 | -  | 1999 | AJ884697 |          | (39) |
| Tz106 | -  | 1999 | AJ884715 |          | (39) |
| Tz107 | -  | 1999 | AJ884696 |          | (39) |
| Tz108 | -  | 1999 | AJ884695 |          | (39) |
| Tz109 | -  | 1999 | AJ884694 |          | (39) |
| Tz111 | -  | 1999 | AJ884714 |          | (39) |
| Tz112 | -  | 1999 | AJ884712 |          | (39) |
| Tz113 | -  | 1999 | AJ884711 |          | (39) |
| Tz115 | -  | 1999 | AJ884710 |          | (39) |
| Tz116 | -  | 1999 | AJ884709 |          | (39) |
| Tz117 | -  | 1999 | AJ884708 |          | (39) |
| Tz118 | -  | 1999 | AJ884707 |          | (39) |
| Tz119 | -  | 1999 | AJ884706 |          | (39) |
| Tz120 | -  | 1999 | AJ884692 |          | (39) |
| Tz121 | -  | 1999 | AJ884704 |          | (39) |
| Tz122 | -  | 1999 | AJ884688 |          | (39) |
| Tz123 | -  | 1999 | AJ884703 |          | (39) |
| Tz124 | -  | 1999 | AJ884702 |          | (39) |
| Tz125 | -  | 1999 | AJ884701 |          | (39) |
| Tz126 | -  | 1999 | AJ884700 |          | (39) |
| Tz127 | -  | 1999 | AJ876793 | AJ876793 | (39) |
| Tz128 | -  | 1999 | AJ884689 |          | (39) |
| Tz129 | -  | 1999 | AJ884713 |          | (39) |
| Tz130 | -  | 1999 | AJ884699 |          | (39) |
| Tz132 | -  | 1999 | AJ884698 |          | (39) |

|       |   |      |          |          |            |
|-------|---|------|----------|----------|------------|
| Tz200 | - | 2005 | AM931220 |          | this study |
| Tz201 | - | 2005 | AM931221 |          | this study |
| Tz202 | - | 2005 |          | AM883057 | (34)       |
| Tz203 | - | 2005 | AM931222 |          | this study |
| Tz204 | - | 2005 | AM931223 |          | this study |
| Tz205 | - | 2005 | AM931224 |          | this study |
| Tz206 | - | 2005 | AM931225 |          | this study |
| Tz207 | - | 2005 | AM931226 |          | this study |
| Tz208 | - | 2005 | AM931227 |          | this study |
| Tz209 | - | 2005 |          | AM883058 | (34)       |
| Tz210 | - | 2005 | AM931228 |          | this study |
| Tz211 | - | 2005 | AM931229 |          | this study |
| Tz212 | - | 2005 | AM931230 |          | this study |
| Tz213 | - | 2005 | AM931231 |          | this study |
| Tz214 | - | 2005 | AM931232 |          | this study |
| Tz215 | - | 2005 | AM931233 |          | this study |
| Tz216 | - | 2005 | AM931234 |          | this study |
| Tz217 | - | 2005 | AM931235 |          | this study |
| Tz218 | - | 2005 | AM931236 |          | this study |
| Tz219 | - | 2005 | AM931237 |          | this study |
| Tz220 | - | 2005 | AM931238 |          | this study |
| Tz221 | - | 2005 | AM931239 |          | this study |
| Tz222 | - | 2005 | AM931240 |          | this study |
| Tz223 | - | 2005 | AM931241 |          | this study |
| Ug1   | V | 2000 | AM114523 |          | (39)       |
| Ug2   | V | 2000 | AM114524 |          | (39)       |

<sup>1</sup>Benin (Be), Burkina Faso (BF), Cameroon (Ca), Côte d'Ivoire (CI), Ghana (Gh), Guinea (Gu), Kenya (Ke), Mali (Ma), Madagascar (Mg), Niger (Ng), Nigeria (Ni), Sierra Leone (SL), Chad (Tc), Togo (Tg), Tanzania (Tz), Uganda (Ug).

<sup>2</sup> Each of the five groups comprised isolates from the same phylogenetic cluster, from the same region with the least population sub-division.

<sup>3</sup> The sequence of the coat protein gene was used to estimate the substitution rate. The full sequence of 22 isolates representative of the genetic and geographic diversity of RYMV was used to assess the nucleotide diversity of the four ORF and of the full genome.
